# Supplementary material for: Applications of robust estimators of covariance in examination of inter-laboratory study data
Source: Royal Society of Chemistry journal article supplement (doi:10.1039/c8ay02724b), 2019-01-01
Supplement: c8ay02724b1.pdf [file c8ay02724b1.pdf]

**ESI: Electronic Supplementary Information for C8AY02724B.**

## Supplementary material

Table S1: Potassium data from an inter-laboratory certification exercise

| Laboratory ID | QC      | RM     |
|---------------|---------|--------|
| Lab01         | 7.9367  | 5.1640 |
| Lab02         | 9.3400  | 5.9400 |
| Lab03         | 7.3969  | 4.7404 |
| Lab04         | 7.6350  | 5.1580 |
| Lab05         | 7.6700  | 4.9720 |
| Lab06         | 8.2500  | 5.4080 |
| Lab07         | 7.7600  | 5.0840 |
| Lab08         | 8.2700  | 5.1900 |
| Lab09         | 10.1200 | 6.5580 |
| Lab11         | 7.9900  | 5.1620 |
| Lab12         | 7.9300  | 5.0980 |
| Lab13         | 8.7933  | 5.7520 |
| Lab14         | 7.8533  | 4.9440 |
| Lab16         | 7.8500  | 5.4060 |
| Lab18         | 7.6600  | 4.7000 |
| Lab19         | 7.7800  | 5.1800 |
| Lab20         | 9.0600  | 5.1960 |
| Lab21         | 7.6191  | 4.9121 |
| Lab22         | 7.4167  | 4.7480 |
| Lab23         | 8.1000  | 5.2800 |
| Lab25         | 7.8700  | 5.1660 |
| Lab26         | 9.0858  | 5.7634 |
| Lab27         | 6.7433  | 3.8200 |
| Lab28         | 7.8167  | 4.9400 |
| Lab29         | 5.2550  | 7.7900 |

The table gives results obtained for potassium in an inter-laboratory reference material certification exercise. Two materials were circulated; a candidate drinking water reference material ("RM") and a performance control material ("QC") made up by spiking demineralised water. All values (shown to four decimal places) are in mg L<sup>-1</sup>. Laboratories measured multiple replicates of each material; the data set comprises the means for each laboratory.

Table S2: Eight elements from a reference material certification study

| Laboratory ID | Arsenic<br>$\mu\text{g L}^{-1}$ | Cadmium<br>$\mu\text{g L}^{-1}$ | Chromium<br>$\mu\text{g L}^{-1}$ | Copper<br>$\mu\text{g L}^{-1}$ | Lead<br>$\mu\text{g L}^{-1}$ | Manganese<br>$\mu\text{g L}^{-1}$ | Nickel<br>$\mu\text{g L}^{-1}$ | Zinc<br>$\mu\text{g L}^{-1}$ |
|---------------|---------------------------------|---------------------------------|----------------------------------|--------------------------------|------------------------------|-----------------------------------|--------------------------------|------------------------------|
| Lab1          | 10.014                          | 5.0900                          | 48.084                           | 2016.0                         | 25.290                       | 50.632                            | 19.740                         | 613.44                       |
| Lab2          | 10.288                          | 4.9880                          | 48.166                           | 1936.4                         | 24.240                       | 47.246                            | 19.214                         | 634.52                       |
| Lab3          | 10.166                          | 4.9719                          | 47.373                           | 1682.4                         | 22.893                       | 48.073                            | 18.525                         | 598.21                       |
| Lab4          | 9.096                           | 4.4700                          | 44.382                           | 1882.2                         | 21.202                       | 44.310                            | 19.568                         | 551.14                       |
| Lab5          | 10.004                          | 4.8880                          | 49.654                           | 1970.8                         | 23.976                       | 48.100                            | 19.624                         | 607.57                       |
| Lab6          | 10.440                          | 4.9560                          | 49.820                           | 1900.0                         | 22.560                       | 48.700                            | 18.520                         | 654.20                       |
| Lab7          | 10.342                          | 4.9220                          | 50.368                           | 1938.3                         | 23.256                       | 49.020                            | 19.944                         | 620.32                       |
| Lab8          | 10.474                          | 4.8440                          | 45.712                           | 2068.2                         | 23.670                       | 46.668                            | 20.616                         | 625.04                       |
| Lab9          | 30.916                          | 4.6120                          | 44.742                           | 1959.9                         | 26.592                       | 47.654                            | 20.340                         | 582.48                       |
| Lab10         | 10.120                          | 3.9580                          | 54.480                           | 2048.0                         | 19.060                       | 51.620                            | NA                             | 578.00                       |
| Lab11         | 10.700                          | 4.9800                          | 48.540                           | 2013.8                         | 26.520                       | 45.300                            | 19.880                         | 626.06                       |
| Lab12         | 9.876                           | 4.8220                          | 46.086                           | 1827.1                         | 23.780                       | 48.072                            | 18.740                         | 608.12                       |
| Lab13         | 10.440                          | 5.1020                          | 51.160                           | 2026.0                         | 24.920                       | 50.500                            | 18.340                         | 603.20                       |
| Lab14         | 10.412                          | 4.8580                          | 49.300                           | 1845.2                         | 22.494                       | 47.460                            | 18.288                         | 554.12                       |
| Lab15         | 10.200                          | 4.8960                          | 48.960                           | 1956.2                         | NA                           | 48.376                            | 19.528                         | NA                           |
| Lab16         | 9.603                           | 4.9120                          | 47.108                           | 2225.2                         | 24.710                       | 49.298                            | 17.432                         | 592.26                       |
| Lab17         | 9.934                           | 4.8220                          | 50.520                           | 2096.0                         | 22.260                       | 49.700                            | 17.580                         | 556.80                       |
| Lab18         | 10.502                          | 4.8616                          | 47.556                           | 1830.5                         | 22.870                       | 46.106                            | 19.528                         | 597.31                       |
| Lab19         | 9.942                           | 4.8120                          | 47.182                           | 1686.8                         | 24.706                       | 43.656                            | 19.184                         | 556.13                       |
| Lab20         | 9.534                           | 4.9180                          | 47.916                           | 1803.7                         | 24.950                       | 53.564                            | 20.032                         | 564.96                       |
| Lab21         | 10.362                          | 4.7042                          | 51.594                           | 2054.7                         | 24.047                       | 50.012                            | 19.823                         | 633.50                       |
| Lab22         | 10.314                          | 4.9660                          | 52.684                           | 1938.2                         | 23.550                       | 49.774                            | 20.840                         | 586.24                       |
| Lab23         | NA                              | 6.0000                          | 48.200                           | 1886.0                         | 30.000                       | 47.800                            | 0.000                          | 620.60                       |
| Lab24         | 10.180                          | 4.8520                          | 47.740                           | 2040.0                         | 23.040                       | 46.720                            | 19.320                         | NA                           |
| Lab25         | 10.054                          | 4.9660                          | 46.266                           | 1893.2                         | 24.262                       | 51.548                            | 19.628                         | 590.62                       |
| Lab26         | 9.794                           | 5.2200                          | 55.467                           | 2019.0                         | 23.160                       | 51.945                            | 21.162                         | 663.69                       |
| Lab27         | NA                              | NA                              | NA                               | 1865.2                         | 22.026                       | 45.982                            | 18.806                         | 559.93                       |
| Lab28         | 5.342                           | NA                              | 45.660                           | 1906.4                         | NA                           | 40.862                            | NA                             | 607.51                       |
| Lab29         | 12.420                          | 6.0300                          | 55.033                           | 1888.7                         | 30.013                       | 50.173                            | 19.977                         | 589.88                       |

The table shows the mean of (nominally) five replicates per laboratory for each of eight elements in a reference material certification exercise. NA denotes missing values; that is, the laboratory did not report results for the element concerned.
